# Supplementary material
Source: ML conference proceedings conference paper supplement (https://proceedings.mlr.press/v32/kontorovicha14.html)
Supplement: Supplementary file 1 [file kontorovicha14-supp.zip › icml-camera-app.pdf]

## A. Comparing the metric and the subgaussian diameters

*Proof of Inequality (8).* Let  $\Xi = \Xi(\mathcal{X})$  be the symmetrized distance. By (5), we have  $\mathbb{E}[\Xi] = 0$  and certainly  $|\Xi| \leq \text{diam}(\mathcal{X})$ . Hence,

$$\mathbb{E}e^{\lambda\Xi} \leq \exp((2 \text{diam}(\mathcal{X})\lambda)^2/8) = \exp(\text{diam}(\mathcal{X})^2\lambda^2/2),$$

where the inequality follows from Hoeffding's Lemma.  $\square$

*Proof of Inequality (9).* Let  $\mathcal{X}$  be an  $N$ -point space with the uniform distribution and  $\rho(x, x') = 1$  for all distinct  $x, x' \in \mathcal{X}$ . Then, for independently drawn  $X, X' \in \mathcal{X}$ , we have  $\rho(X, X') = 0$  with probability  $1/N$  and  $\rho(X, X') = 1$  with probability  $1 - 1/N$ . Hence,  $\Xi(\mathcal{X}) = \pm 1$  with probability  $\frac{1}{2}(1 - 1/N)$  and 0 with probability  $1/N$ , and

$$\mathbb{E} \exp(\lambda \Xi(\mathcal{X})) = \frac{1}{N} e^1 + \left( \frac{1}{2} - \frac{1}{2N} \right) (e^\lambda + e^{-\lambda}),$$

which approaches  $\cosh(\lambda)$  as  $N \rightarrow \infty$ . Since  $\cosh(\lambda) \leq e^{\lambda^2/2}$ , taking  $N$  sufficiently large makes  $\Delta_{\text{SG}}(\mathcal{X})$  arbitrarily close to  $\text{diam}(\mathcal{X}) = 1$ .  $\square$

A referee has suggested achieving  $\text{diam}(\mathcal{X}) = \Delta_{\text{SG}}(\mathcal{X})$  by considering the same metric as above on a continuous space with a continuous distribution. This indeed works, but the induced triple  $(\mathcal{X}, \rho, \mu)$  is not a metric probability space since the Borel  $\sigma$ -algebra is not compatible with the metric. We do not know whether  $\text{diam}(\mathcal{X}) = \Delta_{\text{SG}}(\mathcal{X})$  is possible in a metric probability space.

## B. The equivalence of (1) and (16)

Suppose that  $f : \mathcal{X}^n \rightarrow \mathbb{R}$  satisfies the Lipschitz condition (2). This is equivalent to saying that  $f$  is 1-Lipschitz with respect to the weighted Hamming metric

$$\rho_w(x, x') = \sum_{i=1}^n w_i \mathbf{1}_{\{x_i \neq x'_i\}}, \quad x, x' \in \mathcal{X}^n.$$

But  $\rho_w$  is nothing but an  $\ell_1$  product metric (in the sense of (3)), with  $\rho_i(x_i, x'_i) = w_i \mathbf{1}_{\{x_i \neq x'_i\}}$ . Since  $\text{diam}(\mathcal{X}_i, \rho_i) = w_i$ , we have that indeed the formulations (1) and (16) are equivalent.

## C. Stability proofs

*Proof of Lemma 1.* It follows from (Bousquet & Elisseeff, 2002, Lemma 7), that for all  $i \in [n]$ ,

$$\begin{aligned} \mathbb{E}[R(\mathcal{A}, S) - \hat{R}_n(\mathcal{A}, S)] &= \\ \mathbb{E}_{Z_1^n, \tilde{Z}_1^n} [L(\mathcal{A}_{Z_1^n}, \tilde{Z}_1) - L(\mathcal{A}_{\tilde{Z}_1^n}, \tilde{Z}_1)], \end{aligned} \quad (29)$$

where  $Z_1^n \sim \mu^n$  and  $\tilde{Z}$  is generated from  $Z$  via the process defined in (11). For fixed  $i \in [n]$  and  $Z_1^{i-1}, Z_{i+1}^n$ , define

$$W_i(Z_i, Z'_i) = L(\mathcal{A}_{Z_1^n}, Z'_i) - L(\mathcal{A}_{Z_1^{i-1} Z'_i Z_{i+1}^n}, Z'_i)$$

and note that (23) implies that  $|W_i(Z_i, Z'_i)| \leq \beta \rho(Z_i, Z'_i)$ . Now rewrite (29) as

$$\begin{aligned} \mathbb{E}[R(\mathcal{A}, S) - \hat{R}_n(\mathcal{A}, S)] &= \\ \sum_{z_1^{i-1}, z_{i+1}^n} \mathbb{P}(z_1^{i-1}) \mathbb{P}(z_{i+1}^n) \sum_{z_i, z'_i} \mathbb{P}(z_i) \mathbb{P}(z'_i) W_i(z_i, z'_i). \end{aligned} \quad (30)$$

Invoking Jensen's inequality and the argument in (17),

$$\begin{aligned} \exp\left(\sum_{z_i, z'_i} \mathbb{P}(z_i) \mathbb{P}(z'_i) W_i(z_i, z'_i)\right) &\leq \sum_{z_i, z'_i} \mathbb{P}(z_i) \mathbb{P}(z'_i) e^{W_i(z_i, z'_i)} \\ &= \frac{1}{2} \left[ \sum_{z_i, z'_i} \mathbb{P}(z_i) \mathbb{P}(z'_i) e^{W_i(z_i, z'_i)} + \sum_{z_i, z'_i} \mathbb{P}(z_i) \mathbb{P}(z'_i) e^{-W_i(z_i, z'_i)} \right] \\ &\leq \frac{1}{2} \left[ \sum_{z_i, z'_i} \mathbb{P}(z_i) \mathbb{P}(z'_i) e^{\beta \rho(z_i, z'_i)} + \sum_{z_i, z'_i} \mathbb{P}(z_i) \mathbb{P}(z'_i) e^{-\beta \rho(z_i, z'_i)} \right] \\ &\leq \exp\left(\frac{1}{2} \beta^2 \Delta_{\text{SG}}^2(\mathcal{Z})\right). \end{aligned}$$

Taking logarithms yields the estimate

$$\sum_{z_i, z'_i} \mathbb{P}(z_i) \mathbb{P}(z'_i) W_i(z_i, z'_i) \leq \frac{1}{2} \beta^2 \Delta_{\text{SG}}^2(\mathcal{Z}), \quad (31)$$

which, after substituting (31) into (30), proves the claim.  $\square$

*Proof of Lemma 2.* We examine the two summands separately. The definition (22) of  $R(\mathcal{A}, \cdot)$  implies that the latter is  $\beta$ -Lipchitz since it is a convex combination of  $\beta$ -Lipschitz functions. Now  $\hat{R}_n(\mathcal{A}, \cdot)$  defined in (21) is also a convex combination of  $\beta$ -Lipschitz functions, but because  $z_i$  appears twice in  $L(\mathcal{A}_{Z_1^n}, z_i)$ , changing  $z_i$  to  $z'_i$  could incur a difference of up to  $2\beta\rho(z_i, z'_i)$ . Hence,  $\hat{R}_n(\mathcal{A}, \cdot)$  is  $2\beta$ -Lipschitz. Since the Lipschitz seminorm is subadditive, the claim is proved.  $\square$

## D. Non-iid proof

*Proof of Theorem 3.* We begin by examining the martingale difference

$$V_i = \mathbb{E}[\varphi | X_1^i = x_1^i] - \mathbb{E}[\varphi | X_1^{i-1} = x_1^{i-1}]$$

as in the proof of Theorem 1. More explicitly,

$$\begin{aligned} V_i &= \sum_{x_{i+1}^n} \mathbb{P}(x_{i+1}^n | x_1^i) \varphi(x_1^i x_{i+1}^n) - \sum_{x_i^n} \mathbb{P}(x_i^n | x_1^{i-1}) \varphi(x_1^{i-1} x_i^n) \\ &= \sum_{x_i'} \mathbb{P}(x_i' | x_1^{i-1}) \cdot \sum_{x_{i+1}^n} [\mathbb{P}(x_{i+1}^n | x_1^i) \varphi(x_1^i x_{i+1}^n) - \\ &\quad \mathbb{P}(x_{i+1}^n | x_1^{i-1} x_i') \varphi(x_1^{i-1} x_i' x_{i+1}^n)]. \end{aligned}$$

Write  $\tilde{V}_i$  to denote  $V_i$  as a function of  $X_1^{i-1}$  with  $X_i$  integrated out:

$$\begin{aligned} \tilde{V}_i &= \sum_{x_i, x_i'} \mathbb{P}(x_i | X_1^{i-1}) \mathbb{P}(x_i' | X_1^{i-1}) \cdot \\ &\quad \sum_{x_{i+1}^n} [\mathbb{P}(x_{i+1}^n | X_1^{i-1} x_i) \varphi(X_1^{i-1} x_i x_{i+1}^n) \\ &\quad - \mathbb{P}(x_{i+1}^n | X_1^{i-1} x_i') \varphi(X_1^{i-1} x_i' x_{i+1}^n)]. \end{aligned} \quad (32)$$

Let  $\pi$  be an optimal coupling realizing the infimum in the transportation cost distance  $T_{\rho_{i+1}^n}$  used to define  $\tau_i(x_1^i, x_i')$ . Recalling (25), we have

$$\begin{aligned} &\sum_{x_{i+1}^n} [\mathbb{P}(x_{i+1}^n | X_1^{i-1} x_i') \varphi(X_1^{i-1} x_i' x_{i+1}^n) \\ &- \mathbb{P}(x_{i+1}^n | X_1^{i-1} x_i) \varphi(X_1^{i-1} x_i x_{i+1}^n)] \\ &= \mathbb{E}_{(\dot{X}_{i+1}^n, \ddot{X}_{i+1}^n) \sim \pi} [\varphi(X_1^{i-1} x_i \dot{X}_{i+1}^n) - \varphi(X_1^{i-1} x_i' \ddot{X}_{i+1}^n)] \\ &\leq \mathbb{E}_\pi [\varphi(X_1^{i-1} x_i \dot{X}_{i+1}^n) - \varphi(X_1^{i-1} x_i' \ddot{X}_{i+1}^n) + \sum_{j=i+1}^n \rho_j(\dot{X}_j, \ddot{X}_j)] \\ &\leq \mathbb{E}_{\dot{X}_{i+1}^n \sim \mathbb{P}(\cdot | X_1^{i-1} x_i)} [\varphi(X_1^{i-1} x_i \dot{X}_{i+1}^n) - \varphi(X_1^{i-1} x_i' \dot{X}_{i+1}^n)] + \bar{\tau}_i \\ &= F(x_i) - F(x_i') + \bar{\tau}_i, \end{aligned} \quad (33)$$

where the first inequality holds by the Lipschitz property and the second by definition of  $\bar{\tau}_i$ , and  $F : \mathcal{X}_i \rightarrow \mathbb{R}$  is defined by

$$F(y) = \sum_{x_{i+1}^n} \mathbb{P}(x_{i+1}^n | X_1^{i-1} x_i) \varphi(X_1^{i-1} y x_{i+1}^n).$$

Let us substitute (33) into (32):

$$\tilde{V}_i \leq \bar{\tau}_i + \sum_{x_i, x_i'} \mathbb{P}(x_i | X_1^{i-1}) \mathbb{P}(x_i' | X_1^{i-1}) (F(x_i) - F(x_i')).$$

Observe that  $F$  is 1-Lipschitz under  $\rho_i$  and apply Jensen's inequality:

$$\begin{aligned} &\mathbb{E}[e^{\lambda V_i} | X_1^{i-1}] \\ &\leq e^{\lambda \bar{\tau}_i} \sum_{x_i, x_i'} \mathbb{P}(x_i | X_1^{i-1}) \mathbb{P}(x_i' | X_1^{i-1}) e^{\lambda(F(x_i) - F(x_i'))} \\ &\leq e^{\lambda \bar{\tau}_i} \sum_{x_i, x_i'} \mathbb{P}(x_i | X_1^{i-1}) \mathbb{P}(x_i' | X_1^{i-1}) \cosh(\lambda \rho(x_i, x_i')) \\ &\leq \exp\left(\lambda \bar{\tau}_i + \frac{1}{2} \bar{\Delta}_{\text{SG}}^2(\mathcal{X}_i) \lambda^2\right), \end{aligned}$$

where the second inequality follows from the argument in (17) and the third from the definition of  $\bar{\Delta}_{\text{SG}}(\mathcal{X}_i)$ . Repeating the standard martingale argument in (19) yields

$$\begin{aligned} \mathbb{P}(\varphi - \mathbb{E}\varphi > t) &= \mathbb{P}\left(\sum_{i=1}^n V_i > t\right) \\ &\leq \exp\left(\frac{1}{2} \lambda^2 \sum_{i=1}^n \bar{\Delta}_{\text{SG}}^2(\mathcal{X}_i) - \lambda t + \lambda \sum_{i=1}^n \bar{\tau}_i\right). \end{aligned}$$

Optimizing over  $\lambda$  yields the claim.  $\square$
